# Supplementary material for: Design of N-heterocycle based-phthalonitrile/metal phthalocyanine–silver nanoconjugates for cancer therapies
Source: Royal Society of Chemistry journal article supplement (doi:10.1039/d3dt01656k), 2023-01-01
Supplement: d3dt01656k1.pdf [file d3dt01656k1.pdf]

## **For Material and Methods**

### **Cell Culture and MTT Assay**

For this study A549 (Human lung cancer cell line) DLD-1 (human colon adenocarcinoma cell line), and WI38 (normal lung fibroblastic cell line) cell lines were used. Cells were cultured in high glucose DMEM supplemented with 10%FBS, 1% penicillin-streptomycin, and 1% L-glutamine and maintained at 5% CO<sub>2</sub> and 37°C humidified incubator. Cells were cultured in 75 cm<sup>2</sup> flasks. When cells reached 80% confluence were seeded as 5x10<sup>3</sup> cells per well in 96 well plates. The compounds were prepared in concentrations ranging of 12.5-200 μM and exposed to three cell lines in triplicate wells for each concentration. Cis Platin was used as a negative control and non-treated cells were use as control group. Then plates were divided into two groups. One of them was darkness group that maintained in normal culture conditions. And the white light exposure group cells incubated for 1 hour at normal conditions and after that, the plates were moved for the white light irradiation for 2 hours. White lamp was had 3000 lx and the distance between plate surface and light source was 4 cm. After 2-hours plates were removed for the normal incubation conditions. MTT solution (0,5 mg/ml final concentration in dPBS) was added after 24 hours and 3 hours later all wells' contents were aspired and 100 μl DMSO was added to solve formazan crystals. Plates were read at 560 to 750 nm by using ELISA reader (Glomax, Promega, USA). Then, the half maximal inhibitory concentration (IC<sub>50</sub>) was calculated from the obtained optical density (OD) values. Statistical evaluation was made by using T-Test.

## Spectra of Compounds (1-4)

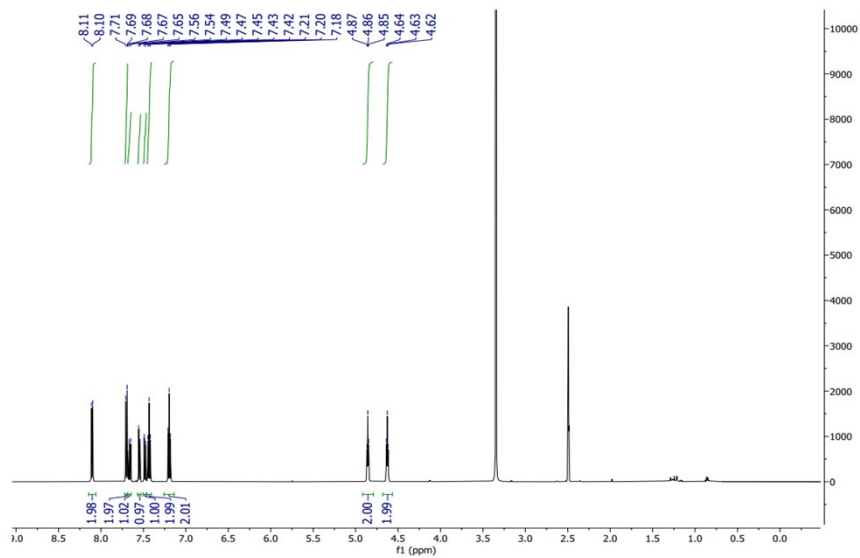

**Spectrum 1. <sup>1</sup>H-NMR (DMSO-d<sub>6</sub>) spectrum of 1**

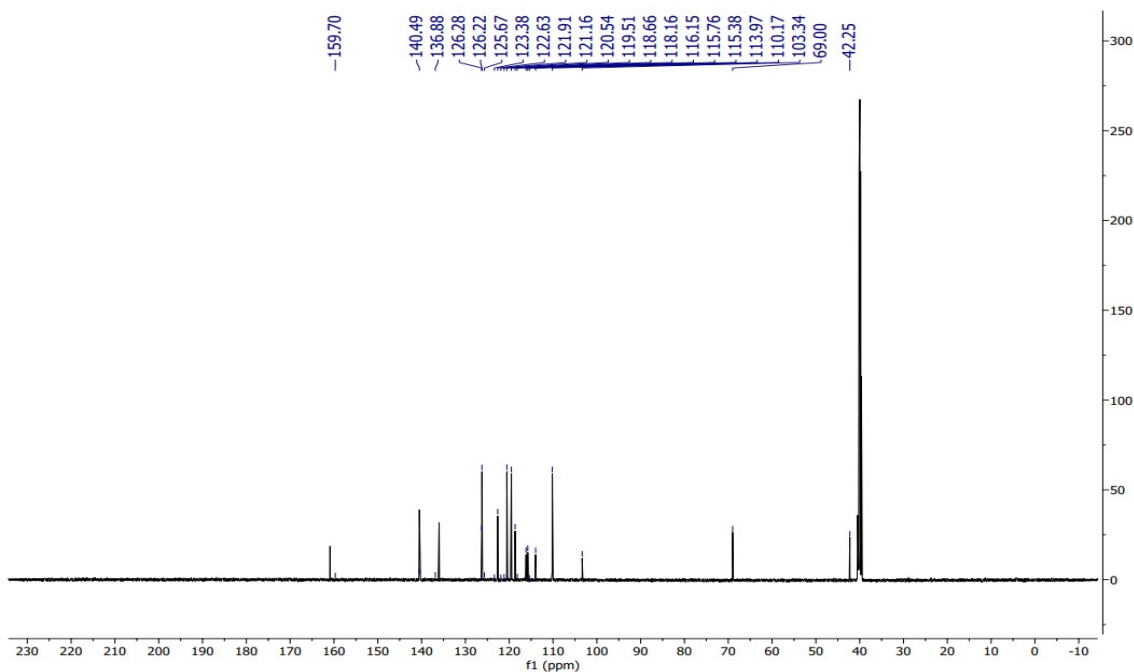

**Spectrum 2. <sup>13</sup>C-NMR (DMSO-d<sub>6</sub>) spectrum of 1**

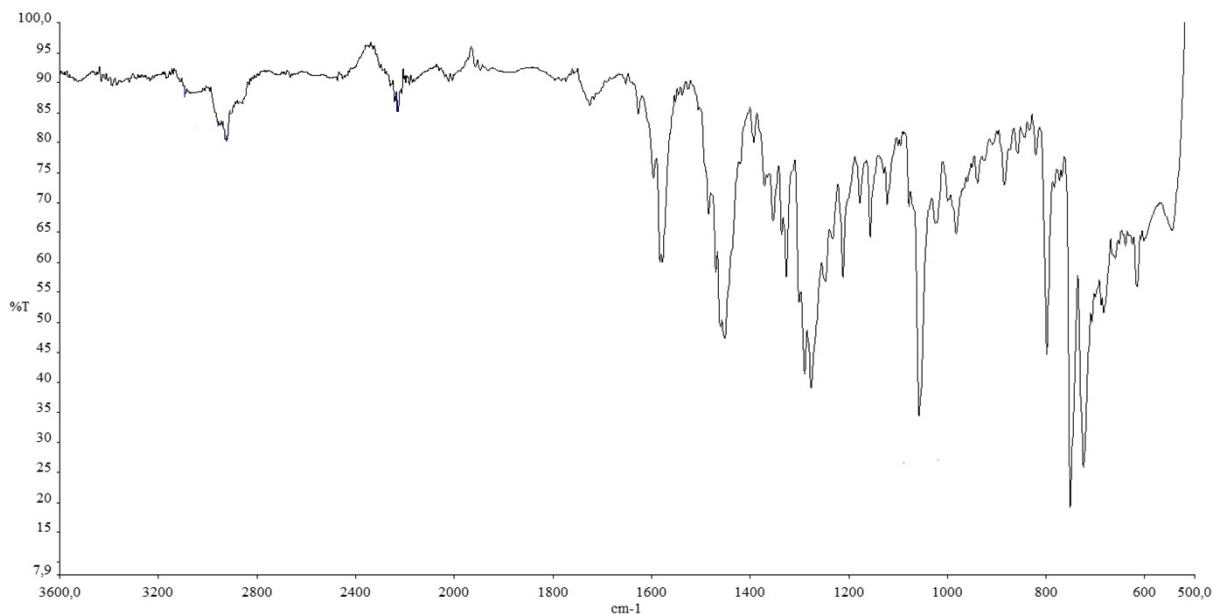

**Spectrum 3. FT-IR spectrum of 1**

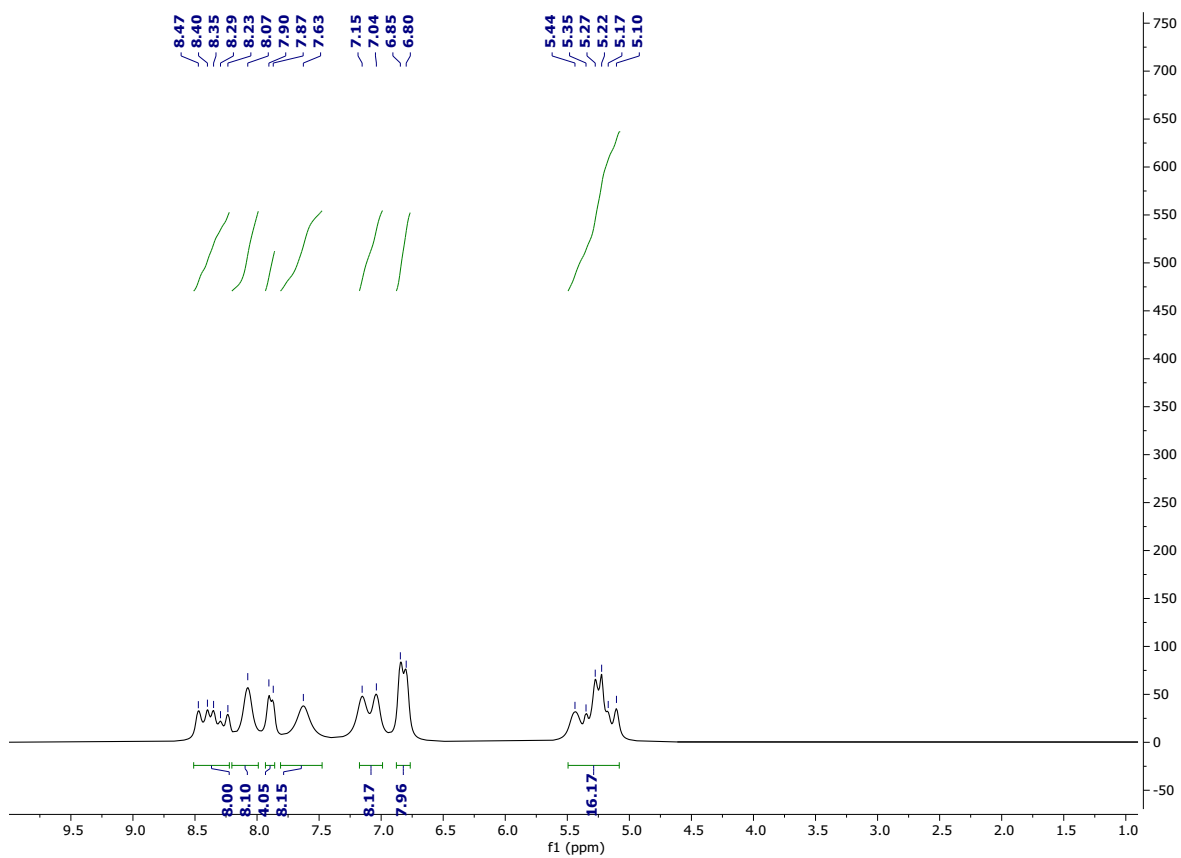

**Spectrum 4. <sup>1</sup>H-NMR (DMSO-d<sub>6</sub>) spectrum of 2**

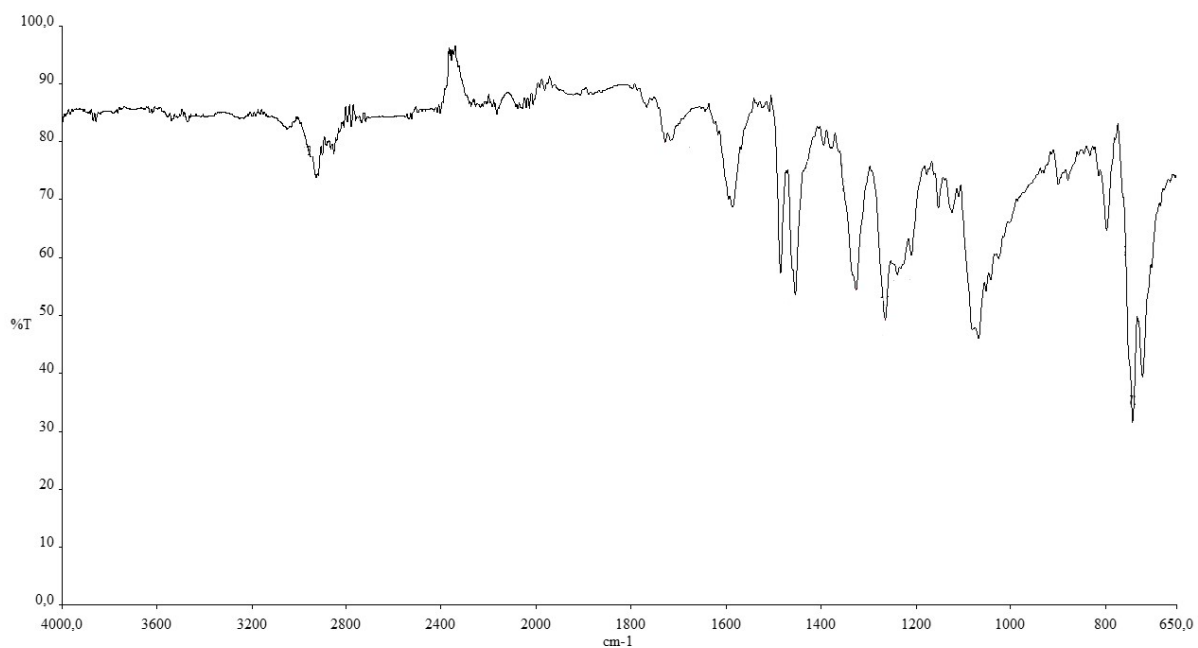

**Spectrum 5. FT-IR spectrum of 2**

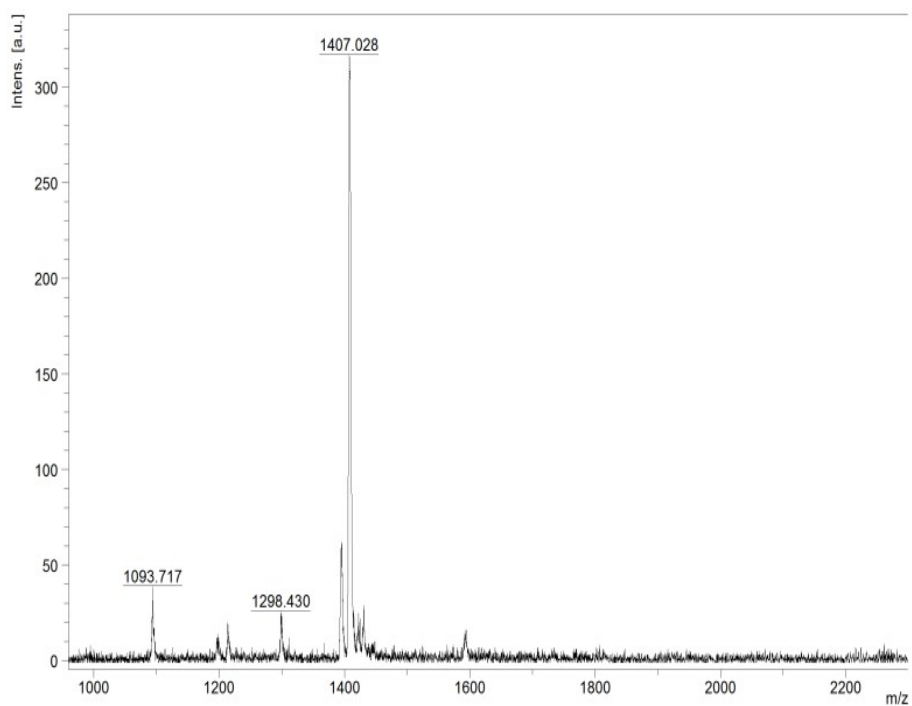

**Spectrum 6. MALDI-TOF Mass spectrum of 3**

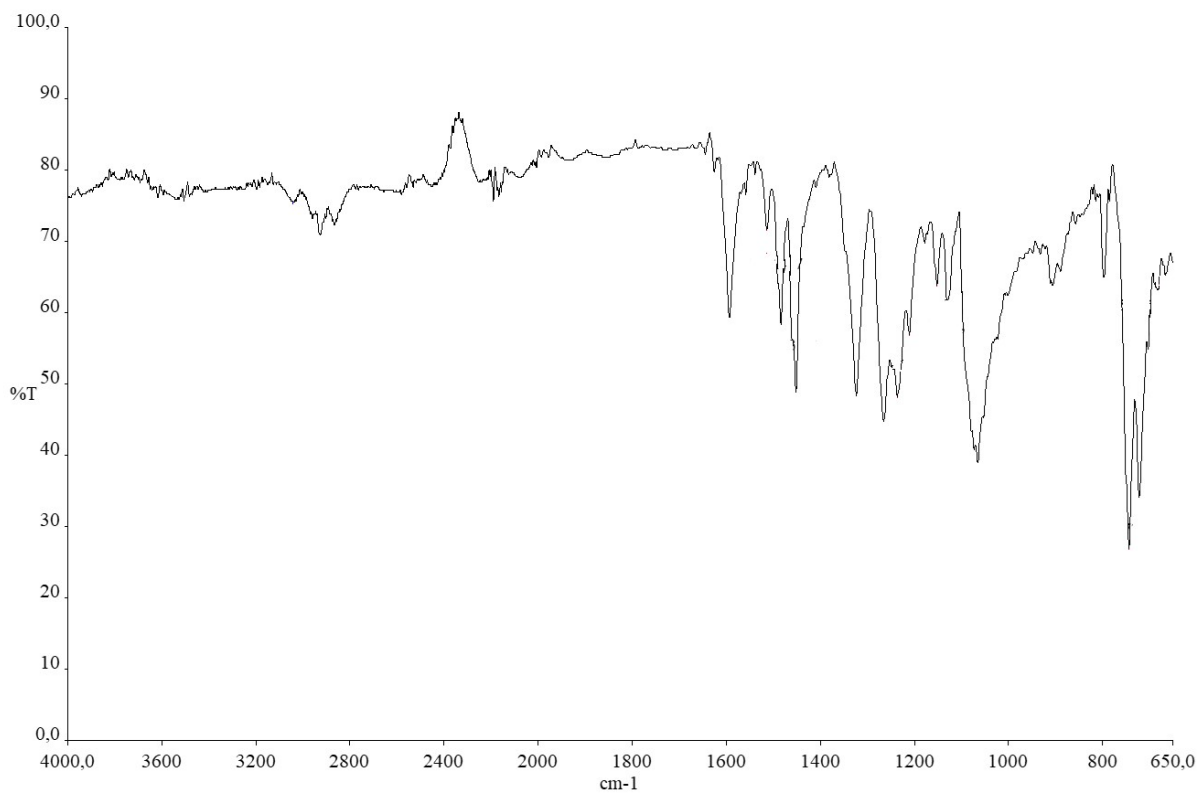

**Spectrum 7. FT- IR spectrum of 3**

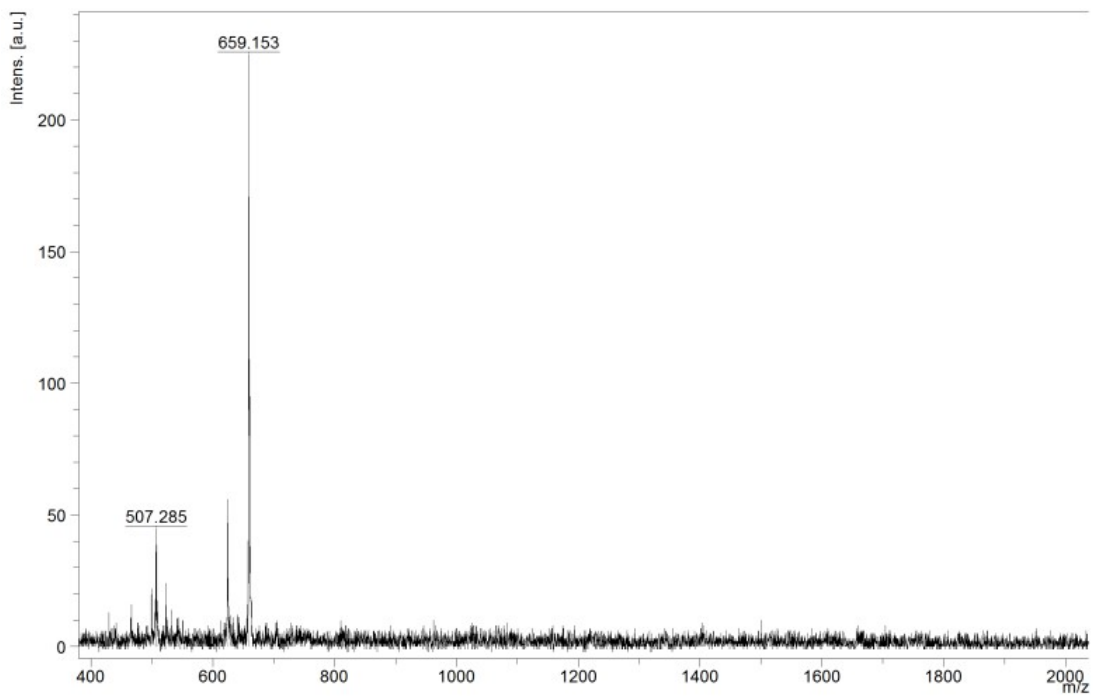

**Spectrum 8. MALDI-Toff Mass spectrum of 4**

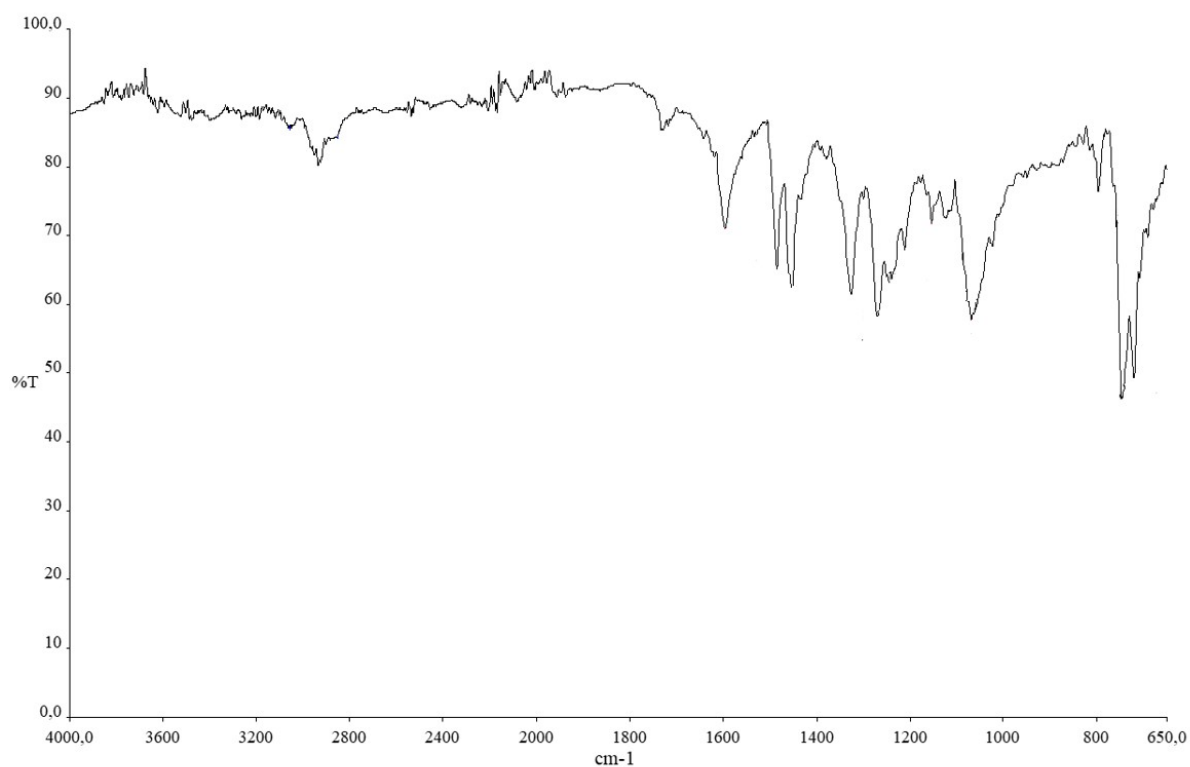

**Spectrum 9. FT- IR spectrum of 4**

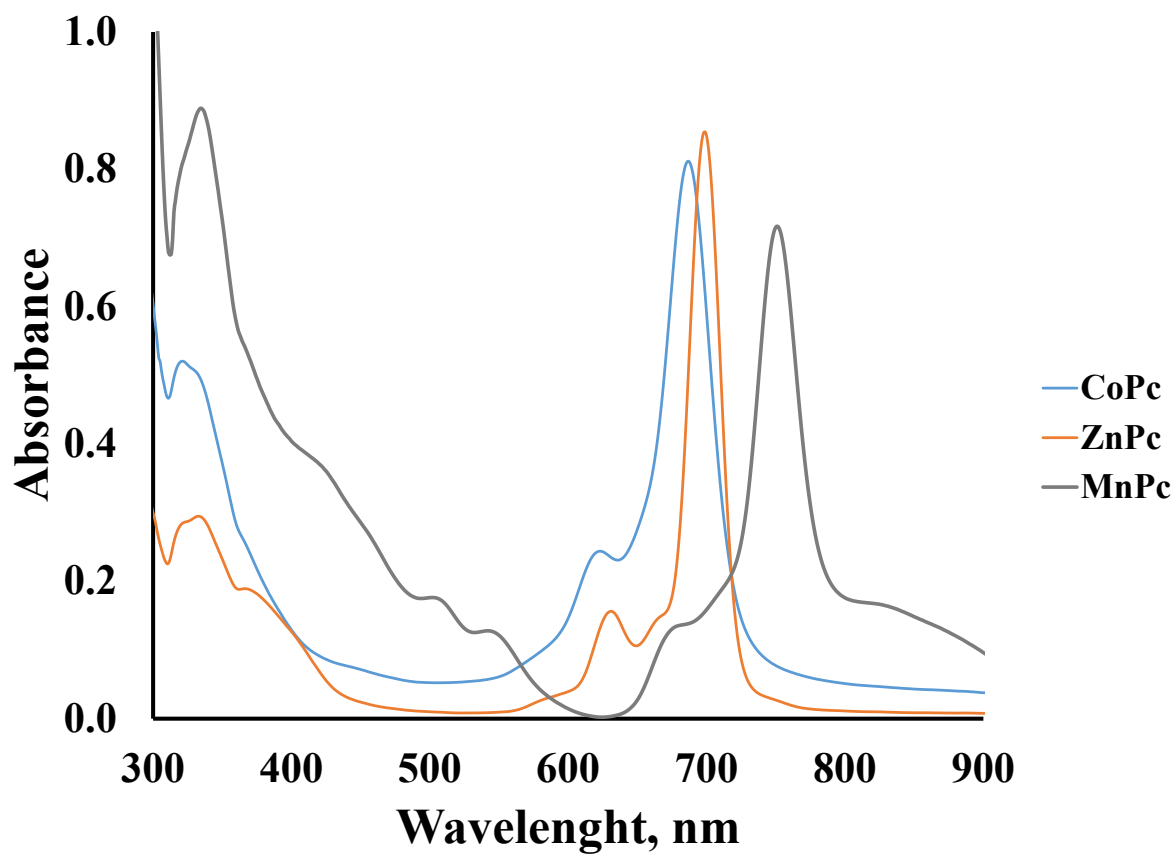

**Spectrum 10. UV-vis spectrum of 2-4**
